# Supplementary material
Source: PubMed Central journal article supplement (PMC4367236)
Supplement: Supp_Figure1.pdf [file Supp_Figure1.pdf]

## Supplementary Data

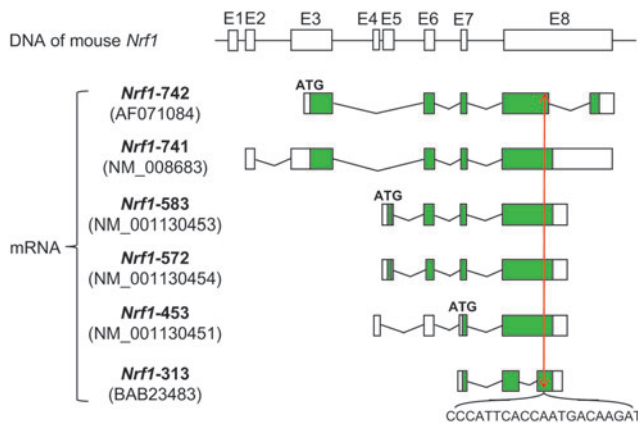

**SUPPLEMENTARY FIG. S1. Schematic diagram of mouse *Nrf1* genomic sequence (Gene ID: ENSMUSG0000038615) and depiction of different isoforms of *Nrf1* transcripts.** *Upper panel*, DNA structure. *White open boxes* labeled by E1-8 represent exons. *Solid black lines* represent introns and 3'- or 5'-flanking regions. Sequences are from the National Center for Biotechnology ([www.ncbi.nlm.nih.gov](http://www.ncbi.nlm.nih.gov)) and Ensemble Genome Browser ([www.ensembl.org](http://www.ensembl.org)). *Lower panel*, mRNA structure of different isoforms of *Nrf1*. The numbers in parentheses under each isoform name are the accession numbers in the GenBank. *Green* and *white open boxes* represent coding regions and untranslated regions, respectively. *Solid red line with arrowhead* is the target site of shRNA (sequence is under red line) used in this study. *Nrf1*, nuclear factor-erythroid 2-related factor 1.
