# Supplementary material
Source: PubMed Central journal article supplement (PMC4367236)
Supplement: Supp_Figure2.pdf [file Supp_Figure2.pdf]

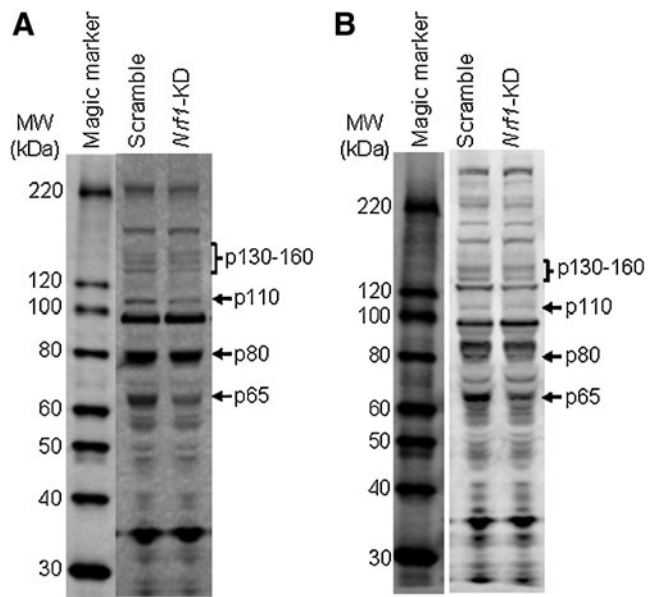

**SUPPLEMENTARY FIG. S2. Representative images of immunoblotting of Nrf1.** (A, B) were determined by sc-13031X (H-285) and sc-721 (C-19) antibodies against Nrf1, respectively.
