# Supplementary material
Source: PubMed Central journal article supplement (PMC4367236)
Supplement: Supp_Figure3.pdf [file Supp_Figure3.pdf]

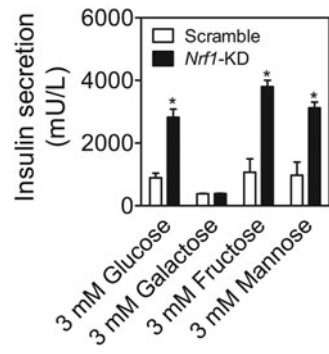

**SUPPLEMENTARY FIG. S3. Insulin secretion in *Nrf1*-KD and Scramble MIN6 cells in response to various carbohydrates.** Cells seeded on a 24-well plate ( $2 \times 10^5$  cells/well) were incubated with 3 mM of glucose, galactose, fructose, or mannose in Kreb's buffer for 30 min.  $n=3$ . \* $p < 0.05$  versus Scramble cells. Insulin was measured by using an  $I^{125}$  Insulin RIA kit (Atom-Hitech, Co., Ltd., Beijing, China).
