# Supplementary material
Source: PubMed Central journal article supplement (PMC4367236)
Supplement: Supp_Figure4.pdf [file Supp_Figure4.pdf]

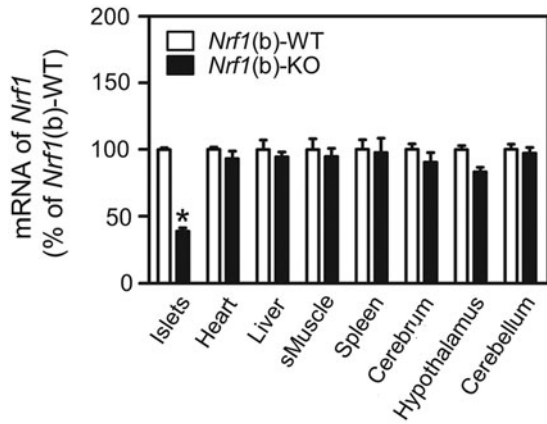

**SUPPLEMENTARY FIG. S4. mRNA expression of *Nrf1* in different tissues determined by real-time RT-qPCR.** The primer set detects isoform-313, -453, -572, -583, -741, and -742 of *Nrf1*. *Nrf1(b)*-WT, wild-type mice; *Nrf1(b)*-KO,  $\beta$ -cell-specific *Nrf1* knockout mice.  $n=3$ . \* $p<0.05$  versus *Nrf1(b)*-WT. KO, knockout; RT-qPCR, reverse transcription-quantitative PCR.
