# Supplementary material
Source: PubMed Central journal article supplement (PMC4367236)
Supplement: Supp_Figure5.pdf [file Supp_Figure5.pdf]

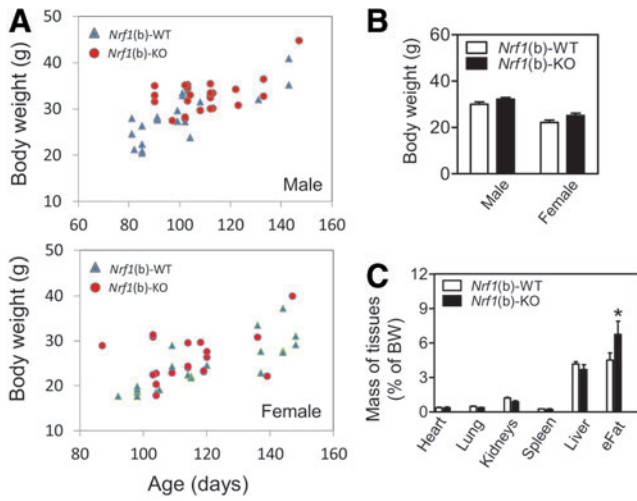

**SUPPLEMENTARY FIG. S5. Body weight and tissue mass of *Nrf1(b)*-KO and *Nrf1(b)*-WT mice.** (A) Body weight distribution of mice at various ages.  $n=19-25$ . (B) Body weight of age-matched mice. Age ranges of male and female mice are 90–108 and 104–120 days, respectively.  $n=10-15$ . (C) Tissue mass of *Nrf1(b)*-KO mice and their wild-type littermates [*Nrf1(b)*-WT].  $n=3$ .  $*p < 0.05$  versus *Nrf1(b)*-WT.
