# Supplementary material
Source: PubMed Central journal article supplement (PMC4367236)
Supplement: Supp_Figure6.pdf [file Supp_Figure6.pdf]

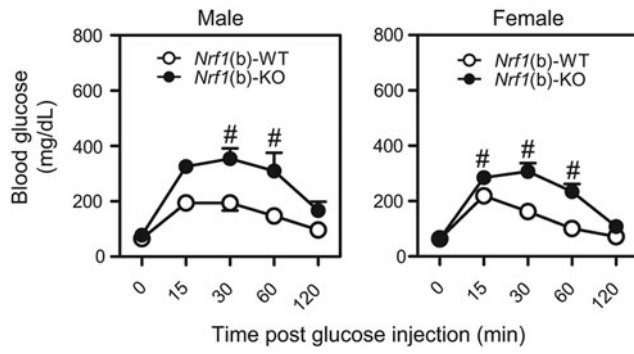

**SUPPLEMENTARY FIG. S6. IPGTT in *Nrf1(b)*-KO and *Nrf1(b)*-WT mice.** Mice were challenged with 1.0 mg of glucose/g of BW.  $n=3-9$ . <sup>#</sup> $p < 0.05$  versus *Nrf1(b)*-WT with the same treatment. IPGTT, intraperitoneal glucose tolerance test.
