# Supplementary material
Source: PubMed Central journal article supplement (PMC4367236)
Supplement: Supp_Figure7.pdf [file Supp_Figure7.pdf]

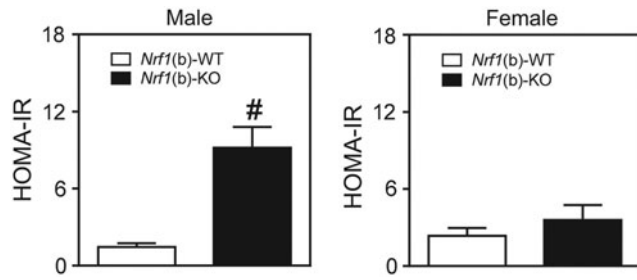

**SUPPLEMENTARY FIG. S7. HOMA-IR in *Nrf1(b)*-KO and *Nrf1(b)*-WT mice.**  $n = 10-14$ . <sup>#</sup> $p < 0.05$  versus *Nrf1(b)*-WT.  $\text{HOMA-IR} = \text{FBG (mg/dL)} \times \text{plasma insulin (ng/ml)} \times 21.2/405$ . HOMA-IR, homeostatic model assessment for insulin resistance.
