# Supplementary material
Source: PubMed Central journal article supplement (PMC4367236)
Supplement: Supp_Figure8.pdf [file Supp_Figure8.pdf]

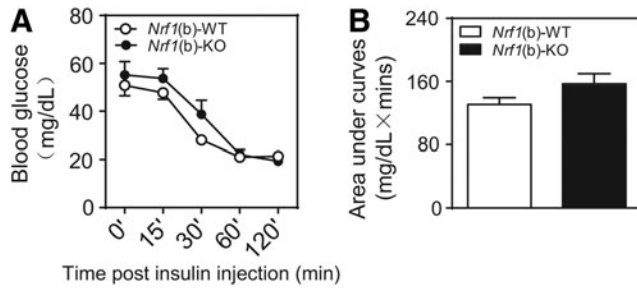

**SUPPLEMENTARY FIG. S8. Intra-peritoneal insulin tolerance test performed in three pairs of age-matched female mice.** (A) Mice were challenged with insulin at 0.75 U/kg of BW, followed by blood glucose measurements at indicated time points. (B) Areas under curves of (A).  $p=0.17$ .
