# Supplementary material
Source: PubMed Central journal article supplement (PMC4367236)
Supplement: Supp_Figure9.pdf [file Supp_Figure9.pdf]

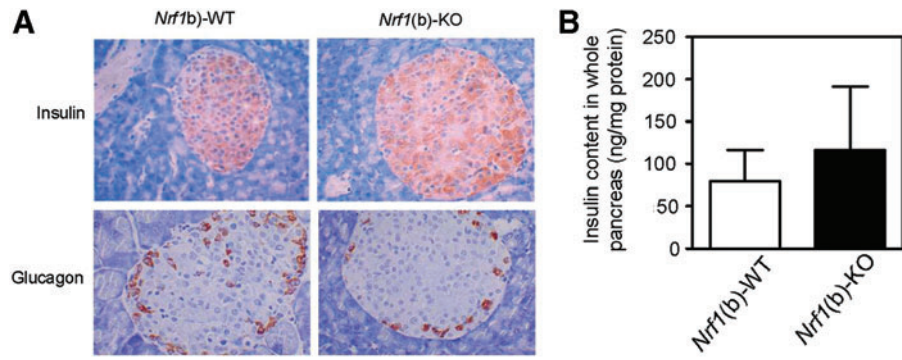

**SUPPLEMENTARY FIG. S9. Protein expression of insulin and glucagon in pancreas of *Nrf1(b)*-KO and *Nrf1(b)*-WT mice.** (A) Representative images of immunostaining of insulin and glucagon in pancreas of male mice.  $n=4-5$ . (B) Insulin content in whole pancreas of male mice.  $n=6-13$ .  $p=0.22$ .
