# Supplementary material
Source: PubMed Central journal article supplement (PMC4367236)
Supplement: Supp_Figure10.pdf [file Supp_Figure10.pdf]

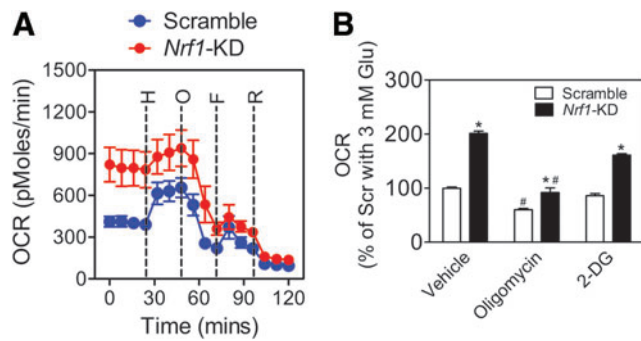

**SUPPLEMENTARY FIG. S10. Effect of *Nrf1* silencing on mitochondrial respiration in MIN6 cells.** (A) Representative result of OCR measured by a Seahorse XF24 analyzer. Measurement was started in Krebs's buffer with 3 mM glucose followed by subsequent addition of 20 mM glucose (H), 1  $\mu$ M oligomycin (O), 1  $\mu$ M FCCP (F), and 1  $\mu$ M rotenone (R).  $n=3-4$ . (B) OCR measured under Vehicle, oligomycin (1  $\mu$ M), or 2-DG (100 mM) in Krebs's buffer with 3 mM glucose.  $n=4-6$ . \* $p < 0.05$  versus Scramble cells with the same treatment; # $p < 0.05$  versus the same cells with Vehicle. 2-DG, 2-deoxy-D-glucose; FCCP, trifluorocarbonyl cyanide phenylhydrazine; OCR, oxygen consumption rate.
