# Supplementary material
Source: PubMed Central journal article supplement (PMC4367236)
Supplement: Supp_Figure11.pdf [file Supp_Figure11.pdf]

*Nrf1(b)*-WT

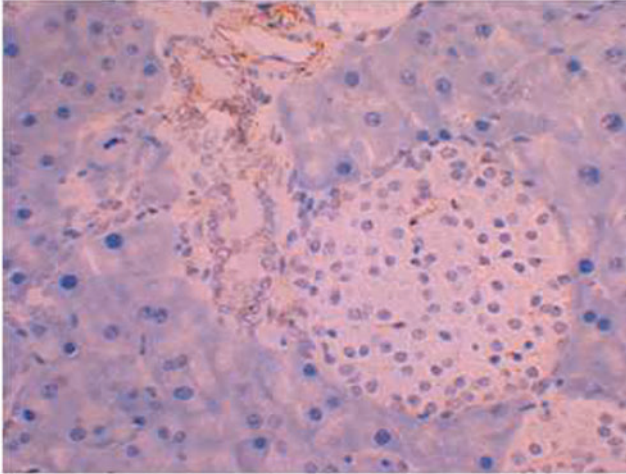

*Nrf1(b)*-KO

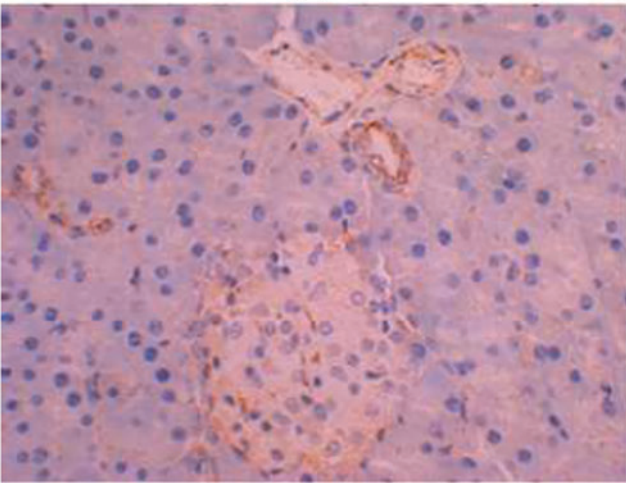

**SUPPLEMENTARY FIG. S11. Representative images of immunostaining of HK1 in pancreas.  $n=3-4$ . HK1, hexokinase 1.**
