# Supplementary material
Source: PubMed Central journal article supplement (PMC4367236)
Supplement: Supp_Figure13.pdf [file Supp_Figure13.pdf]

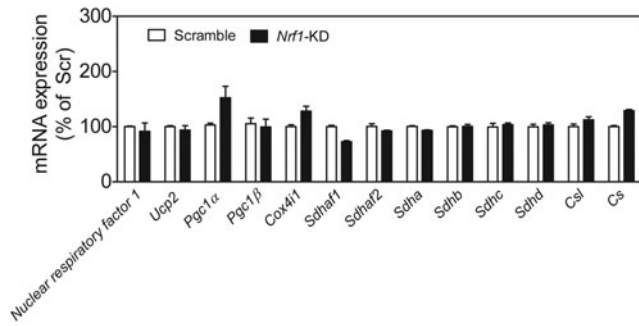

**SUPPLEMENTARY FIG. S13. mRNA expression of mitochondrion-related genes in MIN6 cells.**  $n = 3-18$ . Ucp2, uncoupling protein 2; Pgc1 $\alpha$ , peroxisome proliferator-activated receptor gamma coactivator 1 $\alpha$ ; Pgc1 $\beta$ , peroxisome proliferator-activated receptor gamma coactivator 1 $\beta$ ; Cox4i1, cytochrome c oxidase subunit IV isoform 1; Sdhaf1, succinate dehydrogenase complex assembly factor 1; Sdhaf2, succinate dehydrogenase complex assembly factor 2; Sdha, succinate dehydrogenase complex, subunit A, flavoprotein; Sdhb, succinate dehydrogenase complex, subunit B, iron sulfur; Sdhc, succinate dehydrogenase complex, subunit C, integral membrane protein; Sdhd, succinate dehydrogenase complex, subunit D, integral membrane protein; Csl, citrate synthase like; Cs, citrate synthase.
