# Supplementary material
Source: PubMed Central journal article supplement (PMC4367236)
Supplement: Supp_Figure14.pdf [file Supp_Figure14.pdf]

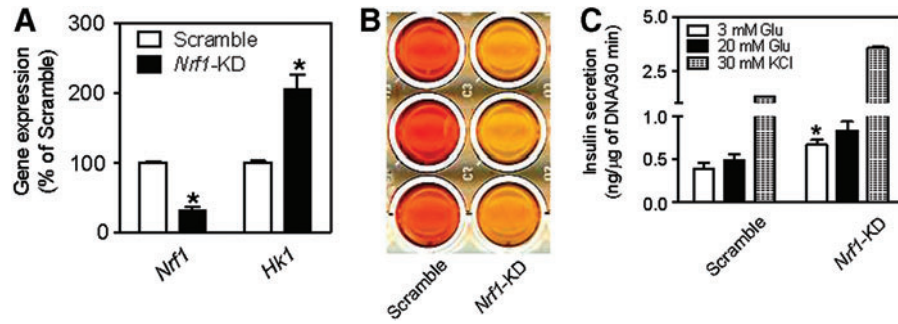

**SUPPLEMENTARY FIG. S14. Effects of *Nrf1* silencing on *Hk1* mRNA expression, glucose metabolism, and insulin secretion in  $\beta$ -TC6 cells.** (A) mRNA expression of *Nrf1* and *Hk1* in *Nrf1*-KD and Scramble cells. *Nrf1*-KD, cells were stably transduced with an shRNA against all isoforms of *Nrf1* as shown in Supplementary Figure S1; Scramble cells transduced with nontarget negative control shRNA; \* $p < 0.05$  versus Scramble cells.  $n = 3$ . (B) Representative image of acidification of culture media in *Nrf1*-KD cells. Confluent cells were cultured in normal growth media for 48 h, followed by image scanning with a HP scanjet G4050. (C) Insulin secretion. Glu, glucose; KCl, potassium chloride;  $n = 6$ . \* $p < 0.05$  versus Scramble with 3 mM Glu.
