# Supplementary material
Source: PubMed Central journal article supplement (PMC4367236)
Supplement: Supp_Figure15.pdf [file Supp_Figure15.pdf]

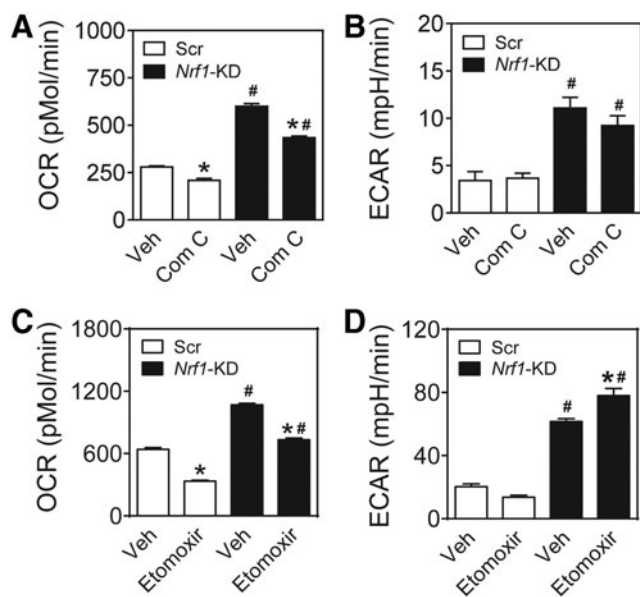

**SUPPLEMENTARY FIG. S15. Effects of inhibition of AMPK or  $\beta$ -oxidation on OCR and ECAR in MIN6 cells.** Scramble (Scr) and *Nrf1*-KD cells were seeded in XF24-well microplates ( $1 \times 10^5$  cells/well) and cultured overnight in growth media. After a 2-h incubation in Kreb's buffer (3 mM glucose) containing either 20  $\mu$ M Compound C (Com C, **A**, **B**) or 100  $\mu$ M etomoxir (**C**, **D**), OCR (**A**, **C**) and ECAR (**B**, **D**) of MIN6 cells were measured simultaneously by a Seahorse XF24 analyzer.  $n=8-12$ . \* $p < 0.05$  versus the same cells with Vehicle (Veh); # $p < 0.05$  versus Scramble cells with the same treatment. AMPK, AMP-activated protein kinase; ECAR, extracellular acidification rate.
