# Supplementary material
Source: PubMed Central journal article supplement (PMC4367236)
Supplement: Supp_Table1.pdf [file Supp_Table1.pdf]

SUPPLEMENTARY TABLE S1. PRIMER SEQUENCES FOR MOUSE GENOTYPING

| Primer name                  | Sequence (5'-3')          | PCR products (bp) |
|------------------------------|---------------------------|-------------------|
| <b>Nrf1-Flox:</b>            |                           |                   |
| <i>Nrf1</i> -Flox-forward    | TGACGGGGACAGAATCACCA      |                   |
| <i>Nrf1</i> -Flox-WT-reverse | CATGTCAGCCCATGCTTTGC      | 262 (Wild-type)   |
| <i>Nrf1</i> -Flox-KI-reverse | GAGAGCCATTTGACTCTTTCCACAA | 360 (Knock-in)    |
| <b>Nrf2-LoxP:</b>            |                           |                   |
| <i>Nrf2</i> -LoxP-forward    | CACAATGGTATGCCTGCTGT      |                   |
| <i>Nrf2</i> -LoxP-WT-reverse | TCTGCACCAGAGTTCAAAGG      | 218 (Wild-type)   |
| <i>Nrf2</i> -LoxP-KI-reverse | AAGAGGGGGTTGGAAAGAGA      | 174 (Knock-in)    |
| <b>Cre:</b>                  |                           |                   |
| <i>Cre</i> -WT-forward       | CTAGGCCACAGAATTGAAAGATCT  |                   |
| <i>Cre</i> -WT-reverse       | GTAGGTGGAAATTCTAGCATCATCC | 324 (Wild-type)   |
| <i>Cre</i> -TG-forward       | GCGGTCTGGCAGTAAAACTATC    |                   |
| <i>Cre</i> -TG-reverse       | GTGAAACAGCATTGCTGTCACTT   | 100 (Trans-gene)  |
