# Supplementary material
Source: PubMed Central journal article supplement (PMC4367236)
Supplement: Supp_Table2.pdf [file Supp_Table2.pdf]

SUPPLEMENTARY TABLE S2. PRIMER SEQUENCES FOR RT-QPCR

| Abbreviations                       | Gene name                                                             | Forward (5' - 3')          | Reverse (5' - 3')        |
|-------------------------------------|-----------------------------------------------------------------------|----------------------------|--------------------------|
| <i>18S</i>                          | 18S ribosomal RNA                                                     | CGAACGCTGCGCCTATCAACTT     | CCGGAATCGAACCCCTGATT     |
| <i>Ant1</i>                         | ATP/ADP translocator                                                  | CATATGCGGAGTTCACTCAGTTTT   | CGTTGCACAAAGGCTTGCT      |
| <i>Cox4i1</i>                       | Cytochrome c oxidase subunit IV isoform 1                             | GCAGCCTTCCAGGGATGA         | TCTCGGCGAAGCTCTCGTTA     |
| <i>Cs</i>                           | Citrate synthase                                                      | TGCTCTGCCCTCCTCATC         | GTGCTGGAGTTGGGTTCCAT     |
| <i>Csl</i>                          | Citrate synthase like                                                 | GACAGTTGTGGCCAGATCA        | AAGTCCCTTCATGCCTCTCATG   |
| <i>Cyc1</i>                         | Cytochrome c1                                                         | CCACCCAAGTGACCCTGTTC       | CCTGGGCTGCTGAGAGCTT      |
| <i>G6pd2</i>                        | Glucose-6-phosphate dehydrogenase 2                                   | CACCACTGCTGCACAAGATTG      | GGCCACGGCTGCCATATA       |
| <i>Gapdh</i>                        | Glyceraldehyde 3-phosphate dehydrogenase                              | AGTATGACTCCACTCACGGCAAAT   | GTCTCGCTCCTGGAAGATGGT    |
| <i>Gck</i>                          | Glucokinase                                                           | GCTTTTGAGACCCGTTTTGTG      | GCCTTCGGTCCCAGAGT        |
| <i>Glut1</i>                        | Glucose transporter type 1                                            | CTGGGCAAGTCCTTTGAGATG      | CCGCAGTACACACCGATGAT     |
| <i>Glut2</i>                        | Glucose transporter type 2                                            | GGCCACCGGTTCTTACATTTT      | GCCATCCACACAGTCCATCTG    |
| <i>Glut4</i>                        | Glucose transporter type 4                                            | CGCACTAGCTGAGCTGAAGGA      | AGGAGCTGGAGCAAGGACATT    |
| <i>Hk1</i>                          | Hexokinase 1                                                          | GACCCGAGGCATCTTCTGA        | AGCAGCGCTAATCGGTCCT      |
| <i>Hk2</i>                          | Hexokinase 2                                                          | CGCCGGATTGGAACAGAA         | CCCCTCGCTAAGTCTCACTCACT  |
| <i>Hk3</i>                          | Hexokinase 3                                                          | GCACCGTCACTTTTTGCA         | CAAGCAACAGCAGTAACCAAAGC  |
| <i>Ldh1</i>                         | Lactate dehydrogenase 1                                               | CGCCCCCATCGT               | GTTGCCATCTTGACTTTGAATC   |
| <i>Ldh2</i>                         | Lactate dehydrogenase 2                                               | GCTGCCGTCCCAGAA            | TGCCATACCCACTTGTCCAA     |
| <i>Nrf1</i>                         | Nuclear factor E2-related factor 1                                    | CAGCAAGTGAGATTCTGTACAATGC  | TGACATTCTGATTGATGGGAGTGT |
| <i>Nuclear respiratory factor 1</i> | Nuclear respiratory factor 1                                          | GCTCAGCTTCGGGCATTTATC      | CCCCAGCCTGGTTTTCC        |
| <i>Pgc1a</i>                        | Peroxisome proliferator activated receptor gamma co-activator 1a      | CCGTAGGCCAGGTACGA          | TGCGGTATTATCCTCTTGA      |
| <i>Pgc1b</i>                        | Peroxisome proliferator activated receptor gamma co-activator 1b      | TCCTGTAAAAGCCCGGAGTAT      | GCTCTGGTAGGGCAGTGA       |
| <i>Proinsulin</i>                   | Proinsulin                                                            | GAGCAGGTGACCTTCAGACCTT     | TGATCTACAATGCCACGCTTCT   |
| <i>Sco1</i>                         | Cytochrome c oxidase assembly protein                                 | TCAGCTGCAGTGAACCAAGTATAGTC | TCCGAGTTCAATTCTCAGTAACCA |
| <i>Sco2</i>                         | Cytochrome c oxidase assembly protein                                 | TGGGCCAGGGTGACTTCA         | GAAGTCGGCTTTGCATCGA      |
| <i>Sdha</i>                         | Succinate dehydrogenase complex, subunit A, flavoprotein              | GCTGGTGTGGATGTCCTAAGG      | CCCACCATGTTGTAATGCA      |
| <i>Sdhb</i>                         | Succinate dehydrogenase complex, subunit B, iron sulfur               | CAGGCCTATCGCTGGATGA        | GGCCAGGCGTTCTCTGT        |
| <i>Sdhc</i>                         | Succinate dehydrogenase complex, subunit C, integral membrane protein | TCAGAAATGCTGCTCCTTTGG      | TTCTTCCAGAACCCTCCAT      |
| <i>Sdhd</i>                         | Succinate dehydrogenase complex, subunit D, integral membrane protein | CCATGCTGTGGAAGCTCTGA       | GAGGCAAGGAGGCACACAAT     |
| <i>Sdhaf1</i>                       | Succinate dehydrogenase complex assembly factor 1                     | TCCCGCCCTTGCT              | CGAGCGCGCAAAAAG          |
| <i>Sdhaf2</i>                       | Succinate dehydrogenase complex assembly factor 2                     | AGCGGGAATCAGCATCAGTT       | AAGTAGGCCCAATGCTATTTGTCT |
| <i>Ucp2</i>                         | Uncoupling protein 2                                                  | CTGTCTGCTTGCAGATTGA        | TCCTGTACTCCAGAGATG       |

The specificity of primers has been validated using melting curve analysis. The PCR efficiencies of the primers were between 90% and 110%, which were determined using purified mRNA of 3T3-L1 cells and/or MIN6 cells.
