# Supplementary material
Source: PubMed Central journal article supplement (PMC4367236)
Supplement: Supp_Table3.pdf [file Supp_Table3.pdf]

SUPPLEMENTARY TABLE S3. PRIMER SEQUENCES FOR REVERSE TRANSCRIPTION-POLYMERASE CHAIN REACTION

| <i>Isoforms of Nrf1</i> | <i>Forward (5'-3')</i>  | <i>Reverse (5'-3')</i>   | <i>Product size (bp)</i> |
|-------------------------|-------------------------|--------------------------|--------------------------|
| 742                     | GGCCCGATTGCTTCGAGAAAAGG | GGCAGTACTCCAGAGCTGACCAAG | 295                      |
| 741                     | CTCCTGTCAGTGGAGACTTAACC | CTGCTTCATCTGTTCGAGAGACC  | 1561                     |
| 453                     | GGATTGGCTCCTTGCGGCAGTAG | GTCTCTCCATCTACTAGCAGGTC  | 185                      |
| 18S                     | CGAACGTCTGCCCTATCAACT   | CCGGAATCGAACCCCTGATT     | 67                       |

The primers were validated using purified mRNA of 3T3-L1 cells and/or MIN6 cells with overexpression of individual isoform of Nrf1 or knockdown of all isoforms of Nrf1.

Nrf1, nuclear factor-erythroid 2-related factor 1.
