# Supplementary material
Source: PubMed Central journal article supplement (PMC4367236)

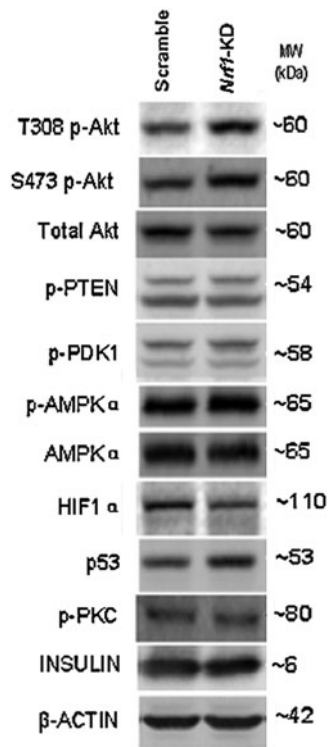

**SUPPLEMENTARY FIG. S12.** Representative images of immunoblotting of MIN6 cells.  $n = 2-6$ .

Supplement: Supp_Figure12.pdf [file Supp_Figure12.pdf]
